# Supplementary material
Source: publisher site journal article supplement (https://www.dovepress.com/article/305830)
Supplement: Supplementary file 1 [file get_supplementary_file.php]

**Supplementary Table 1. Patient Flow (Private Third-Party Payer)**

| **Year** | **2020** | **2021** | **2022** | **2023** |
| --- | --- | --- | --- | --- |
| Total population | 1,000,000 | 1,000,000 | 1,000,000 | 1,000,000 |
| Adult population | 777,482 | 777,482 | 777,482 | 777,482 |
| Multiple Myeloma incidence | 0.006% | 0.006% | 0.006% | 0.006% |
| Previously treated patients (mixed) | 100.0% | 100.0% | 100.0% | 100.0% |
| Proportion in treatment line (any previously treated) | 100.0% | 100.0% | 100.0% | 100.0% |
| Proportion of patients treated | 100.0% | 100.0% | 100.0% | 100.0% |
| ***Incident patients treated*** | ***49*** | ***48*** | ***48*** | ***47*** |

**Supplementary Table 2. Patient Flow (**Data fromKaiser Family Foundation. Medicare beneficiaries as a Percent of Total Population. Available from: https://www.kff.org/medicare/state-indicator/medicare-beneficiaries-as-of-total-pop/?currentTimeframe=0&sortModel=%7B%22colId%22:%22Location%22,%22sort%22:%22asc%22%7D**)**25

| **Year** | **2020** | **2021** | **2022** | **2023** |
| --- | --- | --- | --- | --- |
| Total population | 59,499,015 | 59,917,843 | 60,339,620 | 60,764,366 |
| Adult population | 59,499,015 | 59,917,843 | 60,339,620 | 60,764,366 |
| Multiple Myeloma incidence | 0.038% | 0.039% | 0.039% | 0.039% |
| Previously treated patients (mixed) | 100.0% | 100.0% | 100.0% | 100.0% |
| Proportion in treatment line (any previously treated) | 100.0% | 100.0% | 100.0% | 100.0% |
| Proportion of patients treated | 100.0% | 100.0% | 100.0% | 100.0% |
| ***Incident patients treated*** | ***22,892*** | ***23,069*** | ***23,246*** | ***23,425*** |

**Supplementary Table 3.** Adjusted Adverse Event Prevalence per Month (%)

| **Treatment-Emergent Adverse Events** | | **XVd11** | | **DPd32** | **DRd33** | **EPd34** | **KRd35** | **IRd36** | **Vd11** | **Rd33** | **DAR29** | **DRVd30** | **Pd31** |
| --- | --- | --- | --- | --- | --- | --- | --- | --- | --- | --- | --- | --- | --- |
|
| Anaemia |  | | 1.0 | 1.1 | 0.7 | 1.0 | 0.8 | 0.6 | 0.6 | 0.9 | 0.0 | 0.4 | 2.8 |
| Asthenia |  | | 0.5 | 0.0 | 0.1 | 0.2 | 0.1 | 0.0 | 0.3 | 0.1 | 0.0 | 0.0 | 0.2 |
| Back pain |  | | 0.0 | 0.3 | 0.1 | 0.0 | 0.0 | 0.0 | 0.0 | 0.1 | 0.2 | 0.0 | 0.1 |
| Bronchitis |  | | 0.0 | 0.0 | 0.1 | 0.2 | 0.0 | 0.0 | 0.0 | 0.1 | 0.0 | 0.0 | 0.1 |
| Cataract |  | | 0.5 | 0.0 | 0.0 | 0.0 | 0.1 | 0.0 | 0.1 | 0.0 | 0.0 | 0.0 | 0.0 |
| Constipation |  | | 0.0 | 0.0 | 0.0 | 0.2 | 0.0 | 0.0 | 0.0 | 0.0 | 0.0 | 0.1 | 0.0 |
| Cough |  | | 0.0 | 0.0 | 0.0 | 0.0 | 0.0 | 0.0 | 0.0 | 0.0 | 0.0 | 0.0 | 0.0 |
| Decreased appetite |  | | 0.0 | 0.0 | 0.0 | 0.0 | 0.0 | 0.0 | 0.0 | 0.0 | 0.1 | 0.0 | 0.0 |
| Diarrhoea |  | | 0.4 | 0.0 | 0.3 | 0.0 | 0.2 | 0.1 | 0.0 | 0.1 | 0.1 | 0.3 | 0.1 |
| Dizziness |  | | 0.0 | 0.0 | 0.0 | 0.0 | 0.0 | 0.0 | 0.0 | 0.0 | 0.0 | 0.0 | 0.0 |
| Dyspnoea |  | | 0.0 | 0.3 | 0.2 | 0.3 | 0.1 | 0.0 | 0.0 | 0.0 | 0.1 | 0.0 | 0.1 |
| Fatigue |  | | 0.8 | 0.2 | 0.3 | 0.0 | 0.3 | 0.1 | 0.1 | 0.1 | 0.2 | 0.2 | 0.0 |
| Hyperglycemia |  | | 0.0 | 0.3 | 0.0 | 0.8 | 0.2 | 0.0 | 0.0 | 0.0 | 0.0 | 0.0 | 0.0 |
| Hypokalemia |  | | 0.0 | 0.3 | 0.0 | 0.0 | 0.4 | 0.4 | 0.0 | 0.0 | 0.0 | 0.0 | 0.0 |
| Hypophosphataemia |  | | 0.3 | 0.2 | 0.0 | 0.0 | 0.3 | 0.0 | 0.1 | 0.0 | 0.0 | 0.0 | 0.0 |
| Infections and infestations |  | | 0.0 | 2.2 | 0.0 | 0.0 | 0.0 | 0.0 | 0.0 | 0.0 | 0.0 | 0.0 | 0.0 |
| Insomnia |  | | 0.0 | 0.3 | 0.1 | 0.2 | 0.1 | 0.0 | 0.0 | 0.1 | 0.0 | 0.1 | 0.0 |
| Nasopharyngitis |  | | 0.0 | 0.0 | 0.0 | 0.0 | 0.0 | 0.0 | 0.0 | 0.0 | 0.0 | 0.0 | 0.0 |
| Nausea |  | | 0.5 | 0.0 | 0.1 | 0.0 | 0.0 | 0.0 | 0.0 | 0.0 | 0.0 | 0.0 | 0.0 |
| Neutropenia |  | | 0.5 | 5.5 | 3.0 | 1.4 | 1.5 | 1.4 | 0.2 | 2.0 | 0.0 | 1.8 | 9.9 |
| Oedema peripheral |  | | 0.0 | 0.0 | 0.0 | 0.0 | 0.0 | 0.0 | 0.0 | 0.1 | 0.0 | 0.1 | 0.0 |
| Peripheral neuropathy |  | | 0.3 | 0.0 | 0.0 | 0.0 | 0.0 | 0.0 | 0.5 | 0.0 | 0.0 | 0.3 | 0.0 |
| Pneumonia |  | | 0.9 | 0.8 | 0.5 | 0.5 | 0.5 | 1.1 | 0.7 | 0.4 | 0.7 | 0.0 | 1.4 |
| Pyrexia |  | | 0.0 | 0.0 | 0.1 | 0.0 | 0.0 | 0.0 | 0.0 | 0.1 | 0.1 | 0.1 | 0.0 |
| Thrombocytopenia |  | | 2.9 | 0.8 | 0.6 | 0.8 | 0.7 | 1.4 | 1.1 | 0.7 | 0.0 | 0.8 | 2.4 |
| Upper respiratory tract infection |  | | 0.0 | 0.0 | 0.1 | 0.0 | 0.0 | 0.3 | 0.0 | 0.1 | 0.1 | 0.0 | 0.1 |
| Vomiting |  | | 0.0 | 0.0 | 0.0 | 0.0 | 0.0 | 0.0 | 0.0 | 0.1 | 0.0 | 0.0 | 0.0 |
| Weight decreased |  | | 0.0 | 0.0 | 0.0 | 0.0 | 0.0 | 0.0 | 0.0 | 0.0 | 0.0 | 0.0 | 0.0 |

XVd = selinexor + bortezomib + dexamethasone; DPd = daratumumab + pomalidomide + dexamethasone; DRd = lenalidomide + dexamethasone; EPd = elotuzumab + pomalidomide + dexamethasone; KRd = carfilzomib + lenalidomide + dexamethasone; IRd = Ixazomib, lenalidomide, and dexamethasone; Vd = bortezomib + dexamethasone; Rd = lenalidomide + dexamethasone; DAR = daratumumab; DRVd = daratumumab + lenalidomide + bortezomib + dexamethasone; Pd = pomalidomide + dexamethasone

**Supplementary Table 4.** Final Adverse Event Costs per Month (Millions, USD)

| **Treatment-Emergent Adverse Events** | | **XVd11** | **DPd32** | **DRd33** | **EPd34** | **KRd35** | **IRd36** | **Vd11** | **Rd33** | **DAR29** | **DRVd30** | **Pd31** |
| --- | --- | --- | --- | --- | --- | --- | --- | --- | --- | --- | --- | --- |
|
| Anaemia |  | 15.60 | 17.82 | 10.39 | 15.94 | 12.28 | 10.13 | 9.70 | 14.75 | 0.00 | 5.96 | 43.55 |
| Asthenia |  | 8.66 | 0.00 | 2.48 | 2.86 | 2.28 | 0.00 | 4.52 | 1.99 | 0.00 | 0.00 | 4.11 |
| Back pain |  | 0.00 | 5.03 | 1.33 | 0.00 | 0.00 | 0.00 | 0.00 | 1.11 | 3.38 | 0.72 | 1.83 |
| Bronchitis |  | 0.00 | 0.00 | 1.19 | 2.29 | 0.00 | 0.00 | 0.00 | 1.40 | 0.00 | 0.00 | 0.82 |
| Cataract |  | 8.20 | 0.00 | 0.00 | 0.00 | 1.44 | 0.00 | 1.32 | 0.00 | 0.00 | 0.00 | 0.00 |
| Constipation |  | 0.00 | 0.00 | 0.57 | 2.23 | 0.00 | 0.00 | 0.00 | 0.38 | 0.00 | 1.26 | 0.00 |
| Cough |  | 0.00 | 0.00 | 0.20 | 0.00 | 0.00 | 0.00 | 0.00 | 0.00 | 0.00 | 0.00 | 0.00 |
| Decreased appetite |  | 0.00 | 0.00 | 0.00 | 0.00 | 0.00 | 0.00 | 0.00 | 0.00 | 1.56 | 0.00 | 0.00 |
| Diarrhoea |  | 5.57 | 0.00 | 4.38 | 0.00 | 2.55 | 1.33 | 0.43 | 1.95 | 1.62 | 4.29 | 0.88 |
| Dizziness |  | 0.00 | 0.00 | 0.00 | 0.00 | 0.00 | 0.00 | 0.00 | 0.00 | 0.00 | 0.00 | 0.00 |
| Dyspnoea |  | 0.00 | 3.66 | 2.35 | 4.53 | 1.79 | 0.00 | 0.00 | 0.39 | 1.47 | 0.00 | 1.61 |
| Fatigue |  | 11.54 | 2.96 | 3.62 | 0.00 | 4.52 | 1.23 | 0.79 | 2.00 | 3.01 | 3.28 | 0.00 |
| Hyperglycemia |  | 0.00 | 3.18 | 0.00 | 10.08 | 2.01 | 0.00 | 0.00 | 0.00 | 0.00 | 0.00 | 0.00 |
| Hypokalemia |  | 0.00 | 3.87 | 0.00 | 0.00 | 6.47 | 5.25 | 0.00 | 0.00 | 0.00 | 0.00 | 0.00 |
| Hypophosphataemia |  | 6.26 | 4.35 | 0.00 | 0.00 | 5.84 | 0.00 | 1.74 | 0.00 | 0.00 | 0.00 | 0.00 |
| Infections and infestations |  | 0.00 | 27.51 | 0.00 | 0.00 | 0.00 | 0.00 | 0.00 | 0.00 | 0.00 | 0.00 | 0.00 |
| Insomnia |  | 0.00 | 3.92 | 0.69 | 2.00 | 0.90 | 0.00 | 0.00 | 0.69 | 0.00 | 1.13 | 0.00 |
| Nasopharyngitis |  | 0.00 | 0.00 | 0.00 | 0.00 | 0.00 | 0.00 | 0.00 | 0.00 | 0.00 | 0.00 | 0.00 |
| Nausea |  | 6.99 | 0.00 | 1.06 | 0.00 | 0.00 | 0.00 | 0.00 | 0.43 | 0.00 | 0.70 | 0.00 |
| Neutropenia |  | 13.17 | 138.77 | 75.51 | 34.54 | 37.25 | 34.69 | 4.99 | 49.62 | 0.00 | 43.84 | 247.26 |
| Oedema peripheral |  | 0.00 | 0.00 | 0.35 | 0.00 | 0.00 | 0.00 | 0.00 | 0.70 | 0.00 | 1.14 | 0.00 |
| Peripheral neuropathy |  | 4.97 | 0.00 | 0.00 | 0.00 | 0.00 | 0.00 | 9.59 | 0.00 | 0.00 | 6.03 | 0.00 |
| Pneumonia |  | 15.40 | 14.94 | 9.02 | 8.92 | 9.44 | 18.95 | 12.79 | 6.30 | 11.78 | 0.00 | 24.55 |
| Pyrexia |  | 0.00 | 0.00 | 0.88 | 0.00 | 0.00 | 0.00 | 0.00 | 0.63 | 0.95 | 0.82 | 0.00 |
| Thrombocytopenia |  | 69.66 | 18.82 | 14.17 | 20.48 | 18.01 | 33.73 | 26.04 | 16.26 | 0.00 | 19.34 | 58.24 |
| Upper respiratory tract infection |  | 0.00 | 0.00 | 0.70 | 0.00 | 0.00 | 3.34 | 0.00 | 0.71 | 1.34 | 0.57 | 0.73 |
| Vomiting |  | 0.00 | 0.00 | 0.59 | 0.00 | 0.00 | 0.00 | 0.00 | 0.80 | 0.00 | 0.00 | 0.00 |
| Weight decreased | | 0.00 | 0.00 | 0.00 | 0.00 | 0.00 | 0.00 | 0.00 | 0.00 | 0.00 | 0.00 | 0.00 |
| **Total** |  | **166.00** | **244.83** | **129.48** | **103.87** | **104.79** | **108.65** | **71.90** | **100.10** | **25.11** | **89.10** | **383.57** |

XVd = selinexor + bortezomib + dexamethasone; DPd = daratumumab + pomalidomide + dexamethasone; DRd = daratumumab + lenalidomide + dexamethasone; EPd = elotuzumab + pomalidomide + dexamethasone; KRd = carfilzomib + lenalidomide + dexamethasone; IRd = ixazomib, lenalidomide, and dexamethasone; Vd = bortezomib + dexamethasone; Rd = lenalidomide + dexamethasone; DAR = daratumumab; DRVd = daratumumab + lenalidomide + bortezomib + dexamethasone; Pd = pomalidomide + dexamethasone

**Supplementary Table 5.** Estimation of Cost per Treatment Emergent Adverse Event of Grade 3 or Higher

|  |  | **Inpatient costs** | |
| --- | --- | --- | --- |
| **Treatment-Emergent Adverse Events** | **Average Cost of Adverse Events** | **Unit Cost - Inpatient (inflation adjusted)** | **Unit Cost - Inpatient ($)** |
|
| Anaemia | **1,567** | 32,146.20 | 30,262.40 |
| Asthenia | **1,754** | 36,119.60 | 34,002.95 |
| Back pain | **1,575** | 32,327.32 | 30,432.90 |
| Bronchitis | **1,407** | 28,764.72 | 27,079.07 |
| Cataract | **1,558** | 31,970.70 | 30,097.18 |
| Constipation | **1,366** | 27,892.31 | 26,257.78 |
| Cough | **1,457** | 29,813.66 | 28,066.54 |
| Decreased appetite | **1,460** | 29,888.51 | 28,137.00 |
| Diarrhoea | **1,520** | 31,160.29 | 29,334.26 |
| Dizziness | **1,387** | 28,328.76 | 26,668.66 |
| Dyspnoea | **1,379** | 28,159.28 | 26,509.11 |
| Fatigue | **1,400** | 28,622.26 | 26,944.96 |
| Hyperglycemia | **1,199** | 24,347.31 | 22,920.53 |
| Hypokalemia | **1,459** | 29,864.16 | 28,114.08 |
| Hypophosphataemia | **2,061** | 42,604.69 | 40,108.00 |
| Infections and infestations | **1,277** | 25,997.70 | 24,474.20 |
| Insomnia | **1,227** | 24,942.13 | 23,480.49 |
| Nasopharyngitis | **1,155** | 23,431.43 | 22,058.32 |
| Nausea | **1,514** | 31,008.12 | 29,191.00 |
| Neutropenia | **2,504** | 52,000.78 | 48,953.47 |
| Oedema peripheral | **1,240** | 25,228.92 | 23,750.48 |
| Peripheral neuropathy | **1,821** | 37,530.31 | 35,330.98 |
| Pneumonia | **1,795** | 36,985.15 | 34,817.78 |
| Pyrexia | **890** | 17,797.53 | 16,754.57 |
| Thrombocytopenia | **2,434** | 50,529.25 | 47,568.17 |
| Upper respiratory tract infection | **1,251** | 25,457.94 | 23,966.07 |
| Vomiting | **1,415** | 28,938.93 | 26,700.16 |
| Weight decreased | **1,536** | 31,486.58 | 29,641.43 |

Note: It was assumed that 4.72% and 95.28% of all adverse events occurred in an inpatient- and outpatient- setting, respectively. Outpatient costs i.e. the cost of physician visits were assumed to be $52.33 for all adverse events. In BOSTON, 4.7% (114 out of 2,302) of treatment-emergent adverse events experienced in were severe (BOSTON patient-level data. Physician visit cost source: CPT Unit cost - 99213 - Office or other outpatient visit for the evaluation and management of an established patient.

**Supplementary Figure 1. Absolute Budget Impact, (Millions, USD)**

  
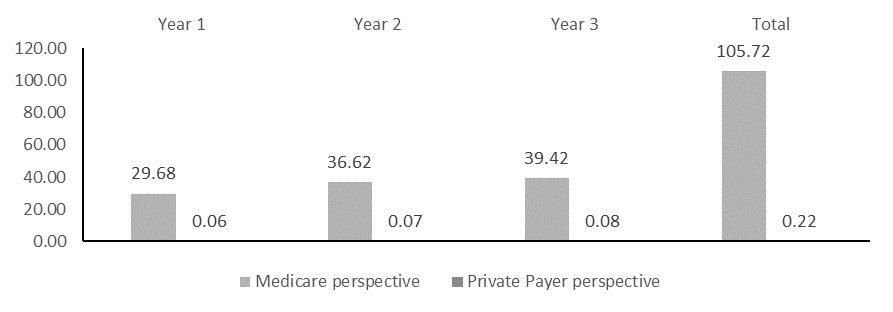


**Supplementary Figure 2. Relative Budget Impact, (%)**

 
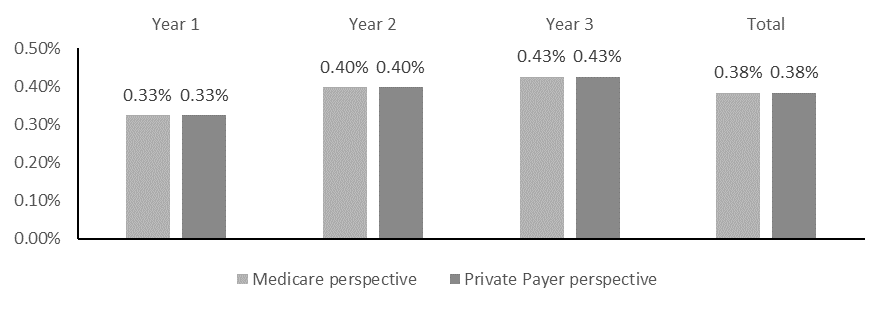


**Supplementary Figure 3. Tornado Diagram - Absolute Budget Impact (Millions, USD)**

 
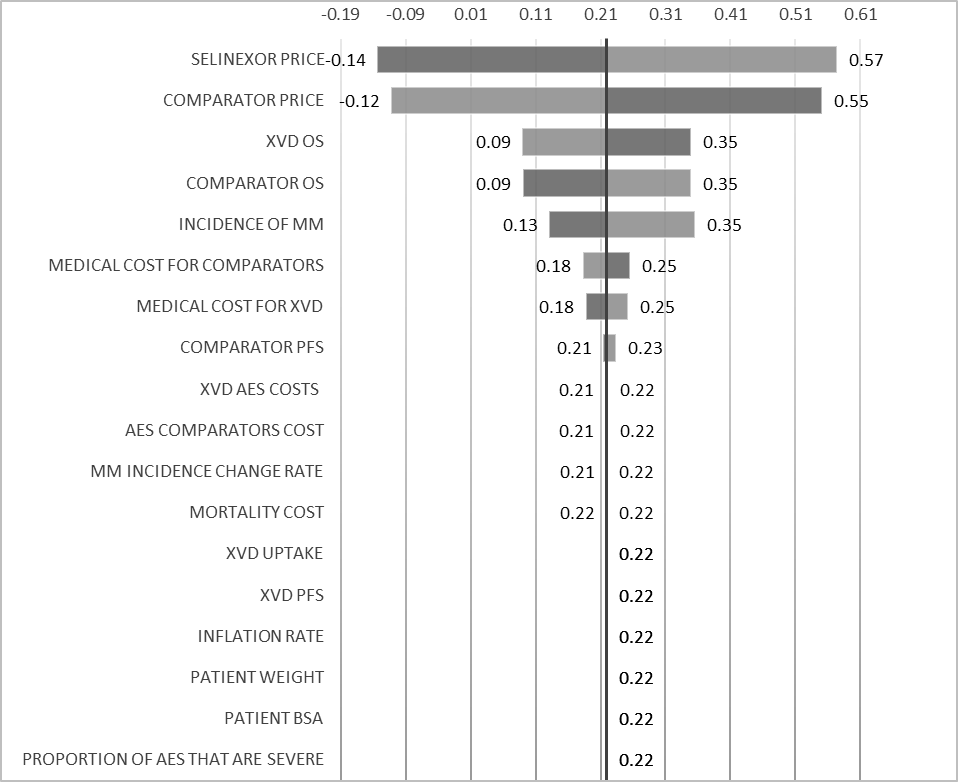


AEs=adverse events; BSA=body surface area; MM=multiple myeloma; OS=overall survival; PFS=progression-free survival; XVd=selinexor-bortezomib-dexamethasone

**Supplementary Table 6.** One-way sensitivity analysis results for a private payer Absolute Budget Impact (Millions, USD)

|  | **Lower bound** | **Base case** | **Upper bound** | **Difference** |
| --- | --- | --- | --- | --- |
| **Selinexor price** | -0.14 | 0.22 | 0.57 | 0.71 |
| **Comparator price** | 0.55 | 0.22 | -0.12 | 0.66 |
| **XVd Overall survival** | 0.35 | 0.22 | 0.09 | 0.26 |
| **Comparator OS** | 0.09 | 0.22 | 0.35 | 0.26 |
| **Incidence of MM** | 0.13 | 0.22 | 0.35 | 0.22 |
| **Medical cost for Comparators** | 0.25 | 0.22 | 0.18 | 0.07 |
| **Medical cost for XVd** | 0.18 | 0.22 | 0.25 | 0.06 |
| **Comparator progression free survival** | 0.21 | 0.22 | 0.23 | 0.02 |
| **XVd AEs costs** | 0.21 | 0.22 | 0.22 | 0.00 |
| **AEs comparators cost** | 0.22 | 0.22 | 0.21 | 0.00 |
| **MM incidence change rate** | 0.22 | 0.22 | 0.21 | 0.00 |
| **Mortality cost** | 0.22 | 0.22 | 0.22 | 0.00 |
| **XVd uptake** | 0.22 | 0.22 | 0.22 | 0.00 |
| **XVd progression free survival** | 0.22 | 0.22 | 0.22 | 0.00 |
| **Inflation rate** | 0.22 | 0.22 | 0.22 | 0.00 |
| **Patient weight** | 0.22 | 0.22 | 0.22 | 0.00 |
| **Patient body surface area** | 0.22 | 0.22 | 0.22 | 0.00 |
| **Proportion of AEs that are severe** | 0.22 | 0.22 | 0.22 | 0.00 |

USD = US dollars; XVd = selinexor + bortezomib + dexamethasone; OS = overall survival; MM = multiple myeloma; AE = adverse events
